# Supplementary material
Source: Springer Nature journal article supplement (https://www.springermedizin.de/resource/supplementary/12889_2013_6632_MOESM3_ESM.pdf/9498648)
Supplement: MOESM3 [file 9498648]

**Identification and Screening**

Articles identified through database searching and then title screened  
(N=792)

Articles excluded for duplication or irrelevancy  
(N=529, 67%)

**Eligibility**

Articles assessed for eligibility for full-text review  
(N=263, 33%)

Full-text articles excluded  
(N=145, 55%)

Full-text articles included  
(N=118, 45%)

**Included and Classification**

Population-based Studies  
(N=92, 78%)

Information Environment Analysis  
(N=26, 22%)

Quantitative Analysis  
(N=79, 86%)

Qualitative Analysis  
(N=8, 9%)

Mixed Methods  
(N=5, 5%)
